# Supplementary material
Source: PubMed Central journal article supplement (PMC2853216)
Supplement: 00032.2009_1.pdf [file 00032.2009_1.pdf]

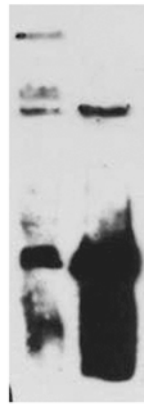

Empty vector  
pmyr-GFP

+

-

rAAV2-PKHD1-  
shRNA

-

+

Legend Supplementary Figure:

Western blot of Fibrocystin-1 in HFCT cell lysates after transfection with empty vector (pmyr-GFP, left lane) and with rAAV2-PKHD1-shRNA (right lane). Note loss of upper (460kDa) band of Fibrocystin-1 full-length protein in shRNA treated cells.
